# Supplementary material
Source: PubMed Central journal article supplement (PMC4840104)
Supplement: NIHMS724212-supplement-01.pdf [file NIHMS724212-supplement-01.pdf]

## SUPPLEMENTAL MATERIALS

**Figure S1a.** Kaplan-Meier curve evaluating mortality in recipients of diabetic versus non-diabetic donor kidneys, stratified by recipient age 40.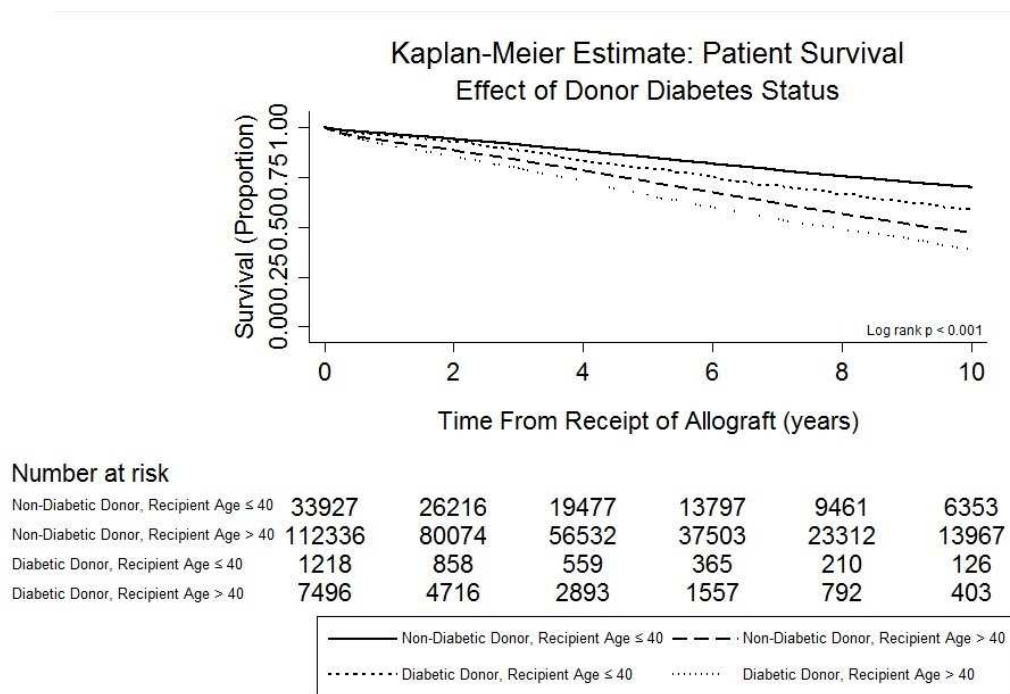**Figure S1b.** Kaplan-Meier curve evaluating all-cause allograft failure in recipients of diabetic versus non-diabetic donor kidneys, stratified by recipient age 40.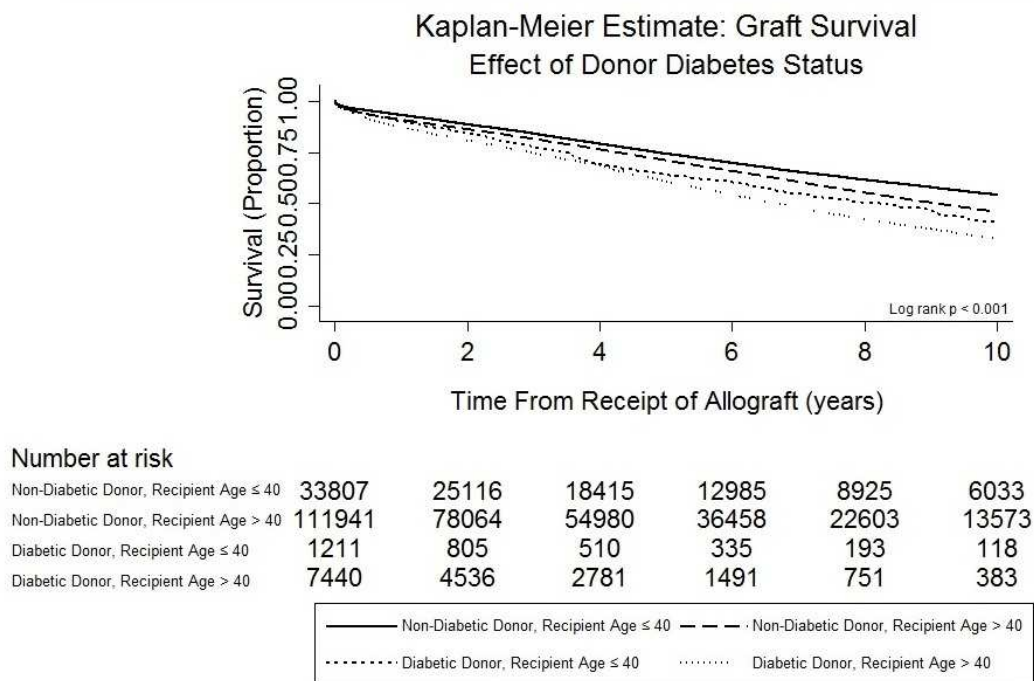

**Figure S1c.** Kaplan-Meier curve evaluating mortality in recipients of diabetic versus non-diabetic donor kidneys, stratified by recipient age 65.

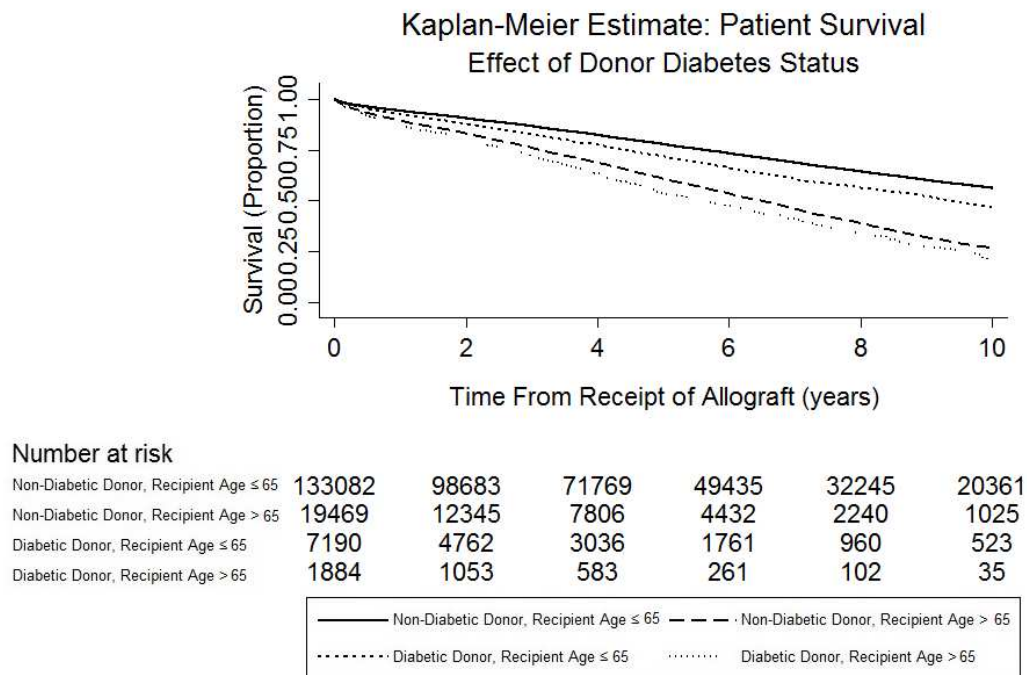

**Figure S1d.** Kaplan-Meier curve evaluating all-cause allograft failure in recipients of diabetic versus non-diabetic donor kidneys, stratified by recipient age 65.

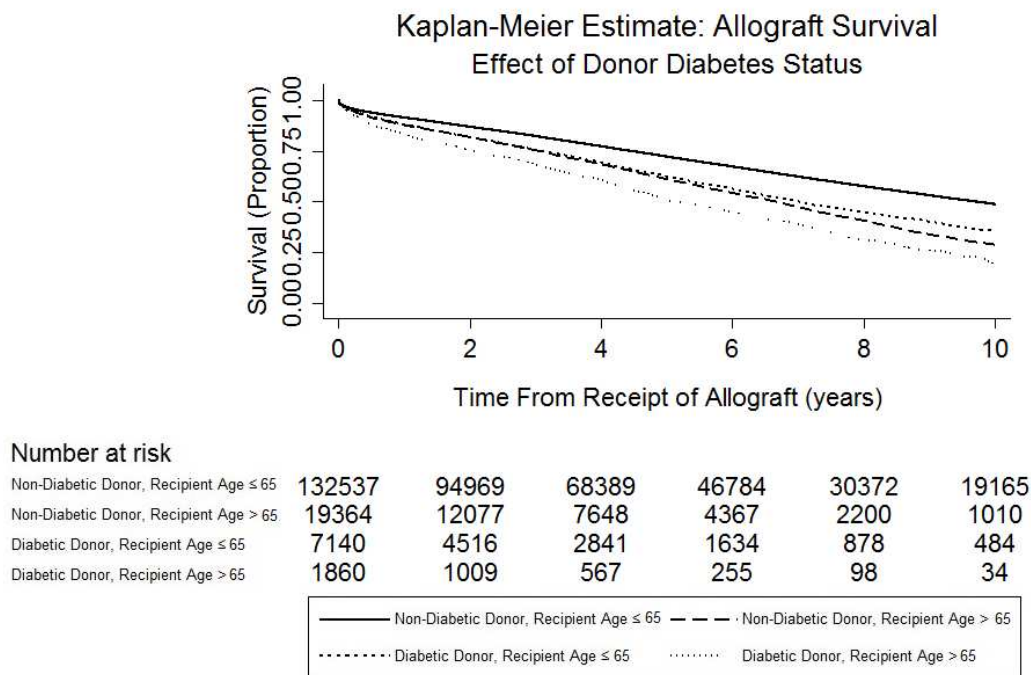

**Figure S1e.** Risk of all-cause allograft failure: Older recipients of non-diabetic donor kidneys vs. younger recipients of diabetic donor kidneys

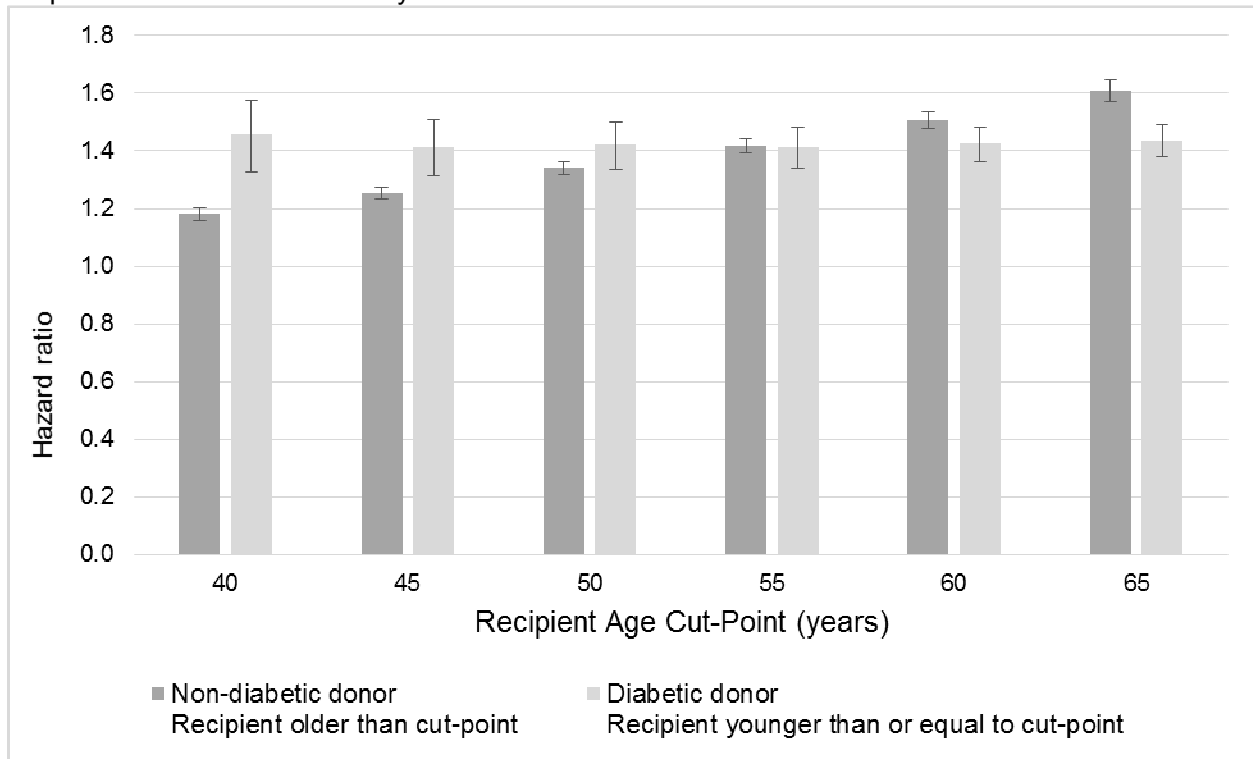

**Figure S2a.** Kaplan-Meier curve evaluating death-censored allograft failure in recipients of diabetic versus non-diabetic donor kidneys.

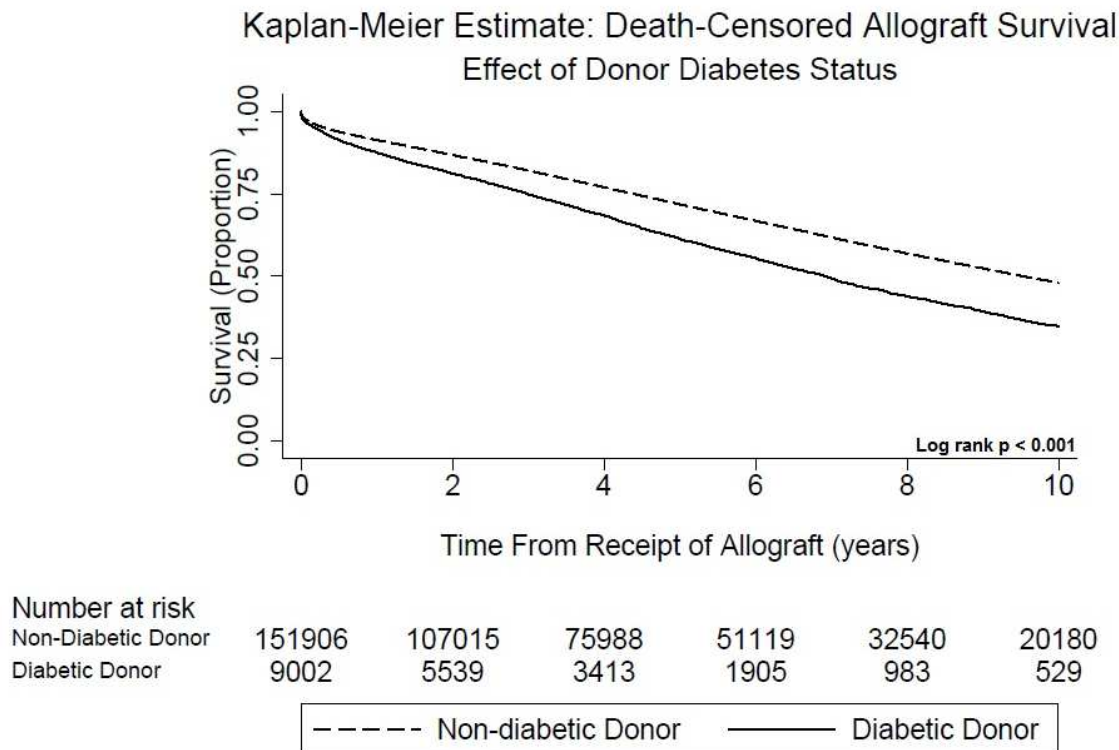

**Figure S2b.** Kaplan-Meier curve evaluating death-censored allograft failure in discordant mate-kidney recipients of diabetic and non-diabetic donor kidneys.

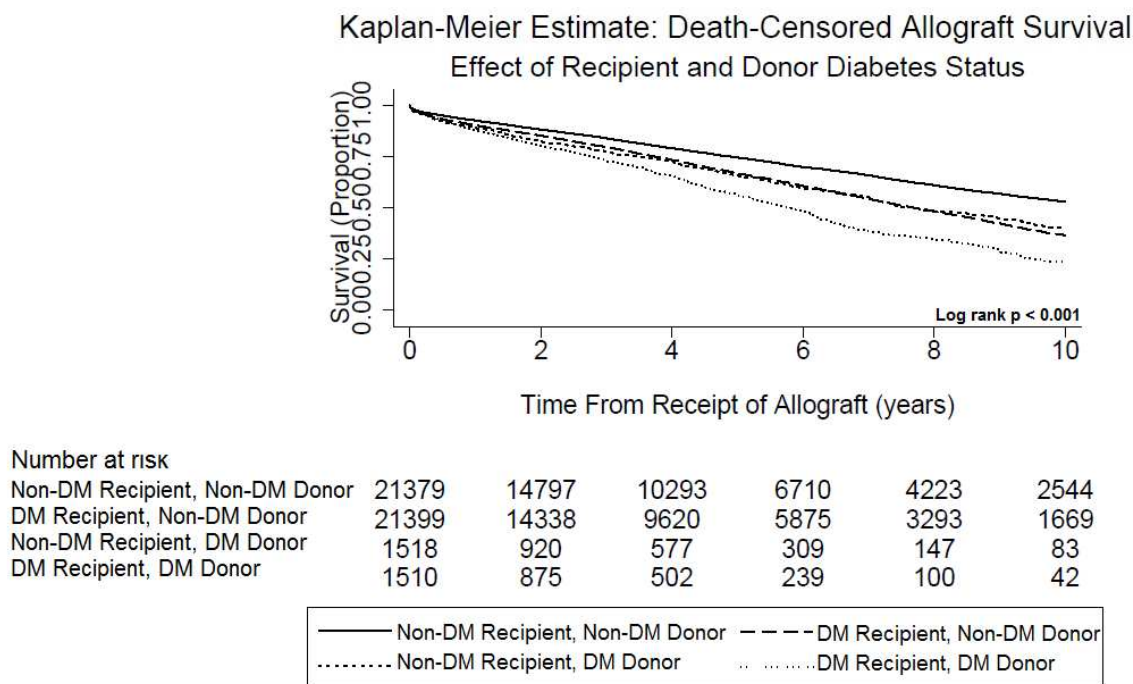

**Table S1a.** Cox proportional hazards model for time to death-censored allograft failure in recipients of diabetic vs. non-diabetic donor kidneys.

|                                  | Multivariable Analysis* |              |             |                   |                    |
|----------------------------------|-------------------------|--------------|-------------|-------------------|--------------------|
|                                  | HR                      | SE           | z           | p-value           | 95% CI             |
| <b>Donor Characteristics</b>     |                         |              |             |                   |                    |
| <b>Diabetes</b>                  | <b>1.174</b>            | <b>0.022</b> | <b>8.57</b> | <b>&lt; 0.001</b> | <b>1.132-1.218</b> |
| ECD                              | 1.560                   | 0.017        | 39.89       | < 0.001           | 1.527-1.595        |
| <b>Recipient Characteristics</b> |                         |              |             |                   |                    |
| Age > 40                         | 1.014                   | 0.017        | 1.34        | 0.179             | 0.994-1.036        |
| Male                             | 1.068                   | 0.011        | 7.07        | < 0.001           | 1.048-1.087        |
| African American Race            | 1.320                   | 0.012        | 29.44       | < 0.001           | 1.296-1.345        |
| HCV+                             | 1.461                   | 0.024        | 23.49       | < 0.001           | 1.416-1.508        |
| Max PRA ≥30                      | 1.114                   | 0.013        | 11.23       | < 0.001           | 1.111-1.162        |
| Pre-Transplant Diabetes**        | 1.011                   | 0.000        | 26.31       | < 0.001           | 1.010-1.011        |
| No Induction Immunosuppression   | 1.084                   | 0.010        | 8.43        | < 0.001           | 1.064-1.105        |

\*Tacrolimus and the interaction term between tacrolimus and time were also included in the multivariable model

\*\*Included as an interaction term along with duration of diabetes

**Table S1b.** Cox proportional hazards model for time to death-censored allograft failure in discordant diabetic vs. non-diabetic recipient pairs

|                                  | Multivariable Analysis* |              |              |                   |                    |
|----------------------------------|-------------------------|--------------|--------------|-------------------|--------------------|
|                                  | HR                      | SE           | z            | p-value           | 95% CI             |
| <b>Non-Diabetic Donor</b>        |                         |              |              |                   |                    |
| <b>Diabetic Recipient</b>        | <b>1.500</b>            | <b>0.044</b> | <b>13.71</b> | <b>&lt; 0.001</b> | <b>1.415-1.589</b> |
| <b>Non-Diabetic Recipient</b>    | REF                     |              |              |                   |                    |
| <b>Diabetic Donor</b>            |                         |              |              |                   |                    |
| <b>Diabetic Recipient</b>        | <b>1.329</b>            | <b>0.134</b> | <b>2.81</b>  | <b>0.005</b>      | <b>1.090-1.620</b> |
| <b>Non-Diabetic Recipient</b>    | REF                     |              |              |                   |                    |
| <b>Recipient Characteristics</b> |                         |              |              |                   |                    |
| Age > 40                         | 1.040                   | 0.055        | 0.75         | 0.454             | 0.938-1.154        |
| Male                             | 1.039                   | 0.043        | 0.92         | 0.358             | 0.958-1.127        |
| African American Race            | 1.197                   | 0.057        | 3.80         | < 0.001           | 1.091-1.313        |
| HCV+                             | 1.136                   | 0.105        | 1.38         | 0.167             | 0.948-1.362        |
| Max PRA ≥30                      | 1.236                   | 0.070        | 3.76         | < 0.001           | 1.107-1.380        |
| No Induction Immunosuppression   | 1.075                   | 0.056        | 1.39         | 0.166             | 0.971-1.190        |

\*Tacrolimus and the interaction term between tacrolimus and time were also included in the multivariable model

**Table S2a.** Cox proportional hazards model for time to death in recipients of diabetic vs. non-diabetic donor kidneys: original combined multivariable model compared to the earlier era (1994-2003) and later era (2004-2013) of diabetic donor transplantation.

|                                  | Multivariable Analysis (combined eras)* |                   |                    | Multivariable Analysis (1994-2003 era)* |                   |                    | Multivariable Analysis (2004-2013 era)* |                   |                    |
|----------------------------------|-----------------------------------------|-------------------|--------------------|-----------------------------------------|-------------------|--------------------|-----------------------------------------|-------------------|--------------------|
|                                  | HR                                      | p-value           | 95% CI             | HR                                      | p-value           | 95% CI             | HR                                      | p-value           | 95% CI             |
| <b>Donor Characteristics</b>     |                                         |                   |                    |                                         |                   |                    |                                         |                   |                    |
| <b>Diabetes</b>                  | <b>1.186</b>                            | <b>&lt; 0.001</b> | <b>1.134-1.240</b> | <b>1.207</b>                            | <b>&lt; 0.001</b> | <b>1.134-1.285</b> | <b>1.314</b>                            | <b>&lt; 0.001</b> | <b>1.232-1.400</b> |
| <b>Recipient Characteristics</b> |                                         |                   |                    |                                         |                   |                    |                                         |                   |                    |
| Age > 40                         | 1.995                                   | < 0.001           | 1.935-2.056        | 2.001                                   | < 0.001           | 1.934-2.071        | 2.370                                   | < 0.001           | 2.215-2.536        |
| Male                             | 1.087                                   | < 0.001           | 1.063-1.111        | 1.096                                   | < 0.001           | 1.067-1.125        | 1.105                                   | < 0.001           | 1.061-1.150        |
| African American Race            | 1.069                                   | < 0.001           | 1.044-1.095        | 1.110                                   | < 0.001           | 1.078-1.142        | 0.981                                   | 0.358             | 0.941-1.022        |
| Pre-Transplant Dialysis**        | 1.025                                   | < 0.001           | 1.022-1.028        | 1.024                                   | < 0.001           | 1.020-1.028        | 1.030                                   | < 0.001           | 1.025-1.035        |
| Prior Renal Transplant           | 1.154                                   | < 0.001           | 1.111-1.198        | 1.054                                   | 0.025             | 1.007-1.103        | 1.036                                   | 0.333             | 0.965-1.112        |
| HCV+                             | 1.426                                   | < 0.001           | 1.372-1.482        | 1.296                                   | < 0.001           | 1.236-1.359        | 1.365                                   | < 0.001           | 1.276-1.462        |
| Pre-Transplant Diabetes**        | 1.020                                   | < 0.001           | 1.020-1.021        | 1.021                                   | < 0.001           | 1.020-1.022        | 1.020                                   | < 0.001           | 1.018-1.021        |

**Table S2b.** Cox proportional hazards model for time to all-cause allograft failure in recipients of diabetic vs. non-diabetic donor kidneys: original combined multivariable model compared to the earlier era (1994-2003) and later era (2004-2013) of diabetic donor transplantation.

|                                  | Multivariable Analysis (combined eras)* |                   |                    | Multivariable Analysis (1994-2003 era)* |                   |                    | Multivariable Analysis (2004-2013 era)* |                   |                    |
|----------------------------------|-----------------------------------------|-------------------|--------------------|-----------------------------------------|-------------------|--------------------|-----------------------------------------|-------------------|--------------------|
|                                  | HR                                      | p-value           | 95% CI             | HR                                      | p-value           | 95% CI             | HR                                      | p-value           | 95% CI             |
| <b>Donor Characteristics</b>     |                                         |                   |                    |                                         |                   |                    |                                         |                   |                    |
| <b>Diabetes</b>                  | <b>1.210</b>                            | <b>&lt; 0.001</b> | <b>1.164-1.258</b> | <b>1.230</b>                            | <b>&lt; 0.001</b> | <b>1.161-1.302</b> | <b>1.293</b>                            | <b>&lt; 0.001</b> | <b>1.227-1.362</b> |
| ECD                              | 1.573                                   | < 0.001           | 1.537-1.611        | 1.518                                   | < 0.001           | 1.472-1.565        | 1.622                                   | < 0.001           | 1.564-1.683        |
| <b>Recipient Characteristics</b> |                                         |                   |                    |                                         |                   |                    |                                         |                   |                    |
| Age > 40                         | 1.008                                   | 0.505             | 0.985-1.031        | 1.094                                   | < 0.001           | 1.065-1.124        | 0.930                                   | < 0.001           | 0.893-0.969        |
| Male                             | 1.073                                   | < 0.001           | 1.052-1.094        | 1.066                                   | < 0.001           | 1.040-1.092        | 1.105                                   | < 0.001           | 1.070-1.141        |
| African American Race            | 1.333                                   | < 0.001           | 1.306-1.359        | 1.354                                   | < 0.001           | 1.320-1.389        | 1.295                                   | < 0.001           | 1.254-1.336        |
| HCV+                             | 1.458                                   | < 0.001           | 1.409-1.509        | 1.351                                   | < 0.001           | 1.293-1.411        | 1.406                                   | < 0.001           | 1.330-1.488        |
| Max PRA ≥30                      | 1.119                                   | < 0.001           | 1.092-1.146        | 1.209                                   | < 0.001           | 1.170-1.248        | 1.054                                   | 0.006             | 1.016-1.095        |
| Pre-Transplant Diabetes**        | 1.012                                   | < 0.001           | 1.012-1.013        | 1.013                                   | < 0.001           | 1.012-1.015        | 1.010                                   | < 0.001           | 1.009-1.012        |
| No Induction Immunosuppression   | 1.116                                   | < 0.001           | 1.093-1.139        | 0.965                                   | 0.003             | 0.942-0.988        | 1.243                                   | < 0.001           | 1.197-1.292        |

**Table S2c.** Cox proportional hazards model for time to death in discordant diabetic vs. non-diabetic recipient pairs: original combined multivariable model compared to the earlier era (1994-2003) and later era (2004-2013) of diabetic donor transplantation.

|  | Multivariable Analysis (combined eras)* |         |        | Multivariable Analysis (1994-2003 era)* |         |        | Multivariable Analysis (2004-2013 era)* |         |        |
|--|-----------------------------------------|---------|--------|-----------------------------------------|---------|--------|-----------------------------------------|---------|--------|
|  | HR                                      | p-value | 95% CI | HR                                      | p-value | 95% CI | HR                                      | p-value | 95% CI |

|                                  |              |                   |                    |              |                   |                    |              |                   |                    |
|----------------------------------|--------------|-------------------|--------------------|--------------|-------------------|--------------------|--------------|-------------------|--------------------|
| <b>Non-Diabetic Donor</b>        |              |                   |                    |              |                   |                    |              |                   |                    |
| <b>Diabetic Recipient</b>        | <b>1.932</b> | <b>&lt; 0.001</b> | <b>1.812-2.060</b> | <b>2.021</b> | <b>&lt; 0.001</b> | <b>1.867-2.187</b> | <b>1.723</b> | <b>&lt; 0.001</b> | <b>1.524-1.949</b> |
| <b>Non-Diabetic Recipient</b>    | REF          |                   |                    | REF          |                   |                    | REF          |                   |                    |
| <b>Diabetic Donor</b>            |              |                   |                    |              |                   |                    |              |                   |                    |
| <b>Diabetic Recipient</b>        | <b>1.532</b> | <b>&lt; 0.001</b> | <b>1.218-1.927</b> | <b>1.465</b> | <b>0.030</b>      | <b>1.037-2.070</b> | <b>1.319</b> | <b>0.127</b>      | <b>0.924-1.882</b> |
| <b>Non-Diabetic Recipient</b>    | REF          |                   |                    | REF          |                   |                    | REF          |                   |                    |
| <b>Recipient Characteristics</b> |              |                   |                    |              |                   |                    |              |                   |                    |
| Age > 40                         | 1.928        | < 0.001           | 1.698-2.189        | 1.812        | < 0.001           | 1.569-2.092        | 2.237        | < 0.001           | 1.664-3.008        |
| Male                             | 1.025        | 0.591             | 0.937-1.120        | 1.019        | 0.738             | 0.912-1.138        | 1.037        | 0.675             | 0.876-1.227        |
| African American Race            | 0.954        | 0.386             | 0.858-1.061        | 0.948        | 0.450             | 0.828-1.088        | 1.006        | 0.952             | 0.829-1.221        |
| Pre-Transplant Dialysis**        | 1.052        | < 0.001           | 1.035-1.070        | 1.044        | < 0.001           | 1.021-1.067        | 1.063        | < 0.001           | 1.033-1.094        |
| Prior Renal Transplant           | 1.200        | 0.031             | 1.017-1.417        | 1.125        | 0.261             | 0.916-1.382        | 1.154        | 0.379             | 0.839-1.588        |
| HCV+                             | 1.090        | 0.417             | 0.885-1.343        | 1.031        | 0.815             | 0.800-1.327        | 0.999        | 0.998             | 0.662-1.509        |

**Table S2d.** Cox proportional hazards model for time to all-cause allograft failure in discordant diabetic vs. non-diabetic recipient pairs: original combined multivariable model compared to the earlier era (1994-2003) and later era (2004-2013) of diabetic donor transplantation.

|                                   | Multivariable Analysis<br>(combined eras)* |                   |                    | Multivariable Analysis<br>(1994-2003 era)* |                   |                    | Multivariable Analysis<br>(2004-2013 era)* |                   |                    |
|-----------------------------------|--------------------------------------------|-------------------|--------------------|--------------------------------------------|-------------------|--------------------|--------------------------------------------|-------------------|--------------------|
|                                   | HR                                         | p-value           | 95% CI             | HR                                         | p-value           | 95% CI             | HR                                         | p-value           | 95% CI             |
| <b>Non-Diabetic Donor</b>         |                                            |                   |                    |                                            |                   |                    |                                            |                   |                    |
| <b>Diabetic Recipient</b>         | <b>1.445</b>                               | <b>&lt; 0.001</b> | <b>1.367-1.527</b> | <b>1.549</b>                               | <b>&lt; 0.001</b> | <b>1.440-1.666</b> | <b>1.276</b>                               | <b>&lt; 0.001</b> | <b>1.161-1.401</b> |
| <b>Non-Diabetic Recipient</b>     | REF                                        |                   |                    | REF                                        |                   |                    | REF                                        |                   |                    |
| <b>Diabetic Donor</b>             |                                            |                   |                    |                                            |                   |                    |                                            |                   |                    |
| <b>Diabetic Recipient</b>         | <b>1.269</b>                               | <b>0.012</b>      | <b>1.054-1.528</b> | <b>1.327</b>                               | <b>0.072</b>      | <b>0.974-1.808</b> | <b>1.147</b>                               | <b>0.058</b>      | <b>0.764-1.283</b> |
| <b>Non-Diabetic Recipient</b>     | REF                                        |                   |                    | REF                                        |                   |                    | REF                                        |                   |                    |
| <b>Recipient Characteristics</b>  |                                            |                   |                    |                                            |                   |                    |                                            |                   |                    |
| Age > 40                          | 1.019                                      | 0.712             | 0.923-1.125        | 1.081                                      | 0.214             | 0.956-1.222        | 0.940                                      | 0.505             | 0.784-1.127        |
| Male                              | 1.061                                      | 0.134             | 0.982-1.146        | 1.036                                      | 0.499             | 0.935-1.148        | 1.088                                      | 0.204             | 0.955-1.240        |
| African American Race             | 1.250                                      | < 0.001           | 1.145-1.366        | 1.177                                      | 0.009             | 1.041-1.332        | 1.416                                      | < 0.001           | 1.229-1.632        |
| HCV+                              | 1.114                                      | 0.222             | 0.936-1.326        | 1.093                                      | 0.435             | 0.874-1.368        | 1.004                                      | 0.977             | 0.740-1.362        |
| Max PRA ≥30                       | 1.226                                      | < 0.001           | 1.104-1.361        | 1.293                                      | 0.001             | 1.116-1.499        | 1.162                                      | -.077             | 0.984-1.372        |
| No Induction<br>Immunosuppression | 1.083                                      | 0.108             | 0.983-1.193        | 0.977                                      | 0.693             | 0.869-1.098        | 1.201                                      | 0.057             | 0.995-1.450        |

\*Tacrolimus and the interaction term between tacrolimus and time were also included in the multivariable model

\*\*Included as an interaction term along with duration of dialysis or diabetes, as appropriate

**Table S3a.** One Year Allograft Survival by KDPI Allocation Group

| <b>KDPI</b>                    | <b>&lt;20%</b> | <b>20-85%</b> | <b>&gt;85%</b> |
|--------------------------------|----------------|---------------|----------------|
| Overall cohort                 | 93.7           | 90.9          | 83.6           |
| Non-DM donor, Non-DM recipient | 94.7           | 92.1          | 84.8           |
| Non-DM donor, DM recipient     | 92.8           | 89.6          | 83.8           |
| DM donor, Non-DM recipient     | 92.9           | 91.1          | 83.1           |
| DM donor, DM recipient         | 95.3           | 87.5          | 82.2           |

**Table S3b.** Two Year Allograft Survival by KDPI Allocation Group

| <b>KDPI</b>                    | <b>&lt;20%</b> | <b>20-85%</b> | <b>&gt;85%</b> |
|--------------------------------|----------------|---------------|----------------|
| Overall cohort                 | 90.3           | 85.9          | 75.9           |
| Non-DM donor, Non-DM recipient | 91.8           | 87.5          | 77.3           |
| Non-DM donor, DM recipient     | 88.5           | 84.3          | 75.6           |
| DM donor, Non-DM recipient     | 85.9           | 85.4          | 75.6           |
| DM donor, DM recipient         | 86.4           | 80.6          | 73.8           |

**Table S3c.** Five Year Allograft Survival by KDPI Allocation Group

| <b>KDPI</b>                    | <b>&lt;20%</b> | <b>20-85%</b> | <b>&gt;85%</b> |
|--------------------------------|----------------|---------------|----------------|
| Overall cohort                 | 77.4           | 69.8          | 55.3           |
| Non-DM donor, Non-DM recipient | 80.1           | 73.2          | 59.7           |
| Non-DM donor, DM recipient     | 72.8           | 65.2          | 50.3           |
| DM donor, Non-DM recipient     | 75.8           | 67.1          | 54.5           |
| DM donor, DM recipient         | 76.9           | 57.7          | 50.9           |

**Table S3d.** Ten Year Allograft Survival by KDPI Allocation Group

| <b>KDPI</b>                    | <b>&lt;20%</b> | <b>20-85%</b> | <b>&gt;85%</b> |
|--------------------------------|----------------|---------------|----------------|
| Overall cohort                 | 54.8           | 44.8          | 29.0           |
| Non-DM donor, Non-DM recipient | 60.4           | 50.8          | 34.2           |
| Non-DM donor, DM recipient     | 43.0           | 33.3          | 20.2           |
| DM donor, Non-DM recipient     | 55.3           | 41.3          | 29.0           |
| DM donor, DM recipient         | 45.9           | 23.6          | 17.0           |

Log rank  $p < 0.001$  and log rank test for trend  $p < 0.001$  for the overall duration of follow up.



**Table S4a.** Cox proportional hazards model for time to death in recipients of diabetic vs. non-diabetic donor kidneys: original multivariable results compared to using multiple imputation

|                                  | Multivariable Analysis* |                   |                    | Multivariable Analysis (after Multiple Imputation)* |                   |                    |
|----------------------------------|-------------------------|-------------------|--------------------|-----------------------------------------------------|-------------------|--------------------|
|                                  | HR                      | p-value           | 95% CI             | HR                                                  | p-value           | 95% CI             |
| <b>Donor Characteristics</b>     |                         |                   |                    |                                                     |                   |                    |
| <b>Diabetes</b>                  | <b>1.186</b>            | <b>&lt; 0.001</b> | <b>1.134-1.240</b> | <b>1.177</b>                                        | <b>&lt; 0.001</b> | <b>1.132-1.222</b> |
| <b>Recipient Characteristics</b> |                         |                   |                    |                                                     |                   |                    |
| Age > 40                         | 1.995                   | < 0.001           | 1.935-2.056        | 1.981                                               | < 0.001           | 1.932-2.032        |
| Male                             | 1.087                   | < 0.001           | 1.063-1.111        | 1.107                                               | < 0.001           | 1.087-1.128        |
| African American Race            | 1.069                   | < 0.001           | 1.044-1.095        | 1.077                                               | < 0.001           | 1.056-1.098        |
| Pre-Transplant Dialysis**        | 1.025                   | < 0.001           | 1.022-1.028        | 1.024                                               | < 0.001           | 1.022-1.027        |
| Prior Renal Transplant           | 1.154                   | < 0.001           | 1.111-1.198        | 1.125                                               | < 0.001           | 1.092-1.158        |
| HCV+                             | 1.426                   | < 0.001           | 1.372-1.482        | 1.372                                               | < 0.001           | 1.327-1.419        |
| Pre-Transplant Diabetes**        | 1.020                   | < 0.001           | 1.020-1.021        | 1.017                                               | < 0.001           | 1.016-1.018        |

**Table S4b.** Cox proportional hazards model for time to all-cause allograft failure in recipients of diabetic vs. non-diabetic donor kidneys: original multivariable results compared to using multiple imputation

|                                  | Multivariable Analysis* |                   |                    | Multivariable Analysis (after Multiple Imputation)* |                   |                    |
|----------------------------------|-------------------------|-------------------|--------------------|-----------------------------------------------------|-------------------|--------------------|
|                                  | HR                      | p-value           | 95% CI             | HR                                                  | p-value           | 95% CI             |
| <b>Donor Characteristics</b>     |                         |                   |                    |                                                     |                   |                    |
| <b>Diabetes</b>                  | <b>1.210</b>            | <b>&lt; 0.001</b> | <b>1.164-1.258</b> | <b>1.187</b>                                        | <b>&lt; 0.001</b> | <b>1.148-1.229</b> |
| ECD                              | 1.573                   | < 0.001           | 1.537-1.611        | 1.568                                               | < 0.001           | 1.536-1.600        |
| <b>Recipient Characteristics</b> |                         |                   |                    |                                                     |                   |                    |
| Age > 40                         | 1.008                   | 0.505             | 0.985-1.031        | 1.036                                               | < 0.001           | 1.016-1.056        |
| Male                             | 1.073                   | < 0.001           | 1.052-1.094        | 1.083                                               | < 0.001           | 1.065-1.101        |
| African American Race            | 1.333                   | < 0.001           | 1.306-1.359        | 1.318                                               | < 0.001           | 1.296-1.341        |
| HCV+                             | 1.458                   | < 0.001           | 1.409-1.509        | 1.417                                               | < 0.001           | 1.374-1.462        |
| Max PRA ≥30                      | 1.119                   | < 0.001           | 1.092-1.146        | 1.137                                               | < 0.001           | 1.114-1.161        |
| Pre-Transplant Diabetes**        | 1.012                   | < 0.001           | 1.012-1.013        | 1.010                                               | < 0.001           | 1.009-1.011        |
| No Induction Immunosuppression   | 1.116                   | < 0.001           | 1.093-1.139        | 1.119                                               | < 0.001           | 1.100-1.138        |

**Table S4c.** Cox proportional hazards model for time to death in discordant diabetic vs. non-diabetic recipient pairs: original multivariable results compared to using multiple imputation

|                           | Multivariable Analysis* |                   |                    | Multivariable Analysis (after Multiple Imputation)* |                   |                    |
|---------------------------|-------------------------|-------------------|--------------------|-----------------------------------------------------|-------------------|--------------------|
|                           | HR                      | p-value           | 95% CI             | HR                                                  | p-value           | 95% CI             |
| <b>Non-Diabetic Donor</b> |                         |                   |                    |                                                     |                   |                    |
| <b>Diabetic Recipient</b> | <b>1.932</b>            | <b>&lt; 0.001</b> | <b>1.812-2.060</b> | <b>1.911</b>                                        | <b>&lt; 0.001</b> | <b>1.806-2.024</b> |

|                                  |              |                   |                    |              |                   |                    |
|----------------------------------|--------------|-------------------|--------------------|--------------|-------------------|--------------------|
| <b>Non-Diabetic Recipient</b>    | REF          |                   |                    | REF          |                   |                    |
| <b>Diabetic Donor</b>            |              |                   |                    |              |                   |                    |
| <b>Diabetic Recipient</b>        | <b>1.532</b> | <b>&lt; 0.001</b> | <b>1.218-1.927</b> | <b>1.584</b> | <b>&lt; 0.001</b> | <b>1.474-1.693</b> |
| <b>Non-Diabetic Recipient</b>    | REF          |                   |                    | REF          |                   |                    |
| <b>Recipient Characteristics</b> |              |                   |                    |              |                   |                    |
| Age > 40                         | 1.928        | < 0.001           | 1.698-2.189        | 1.890        | < 0.001           | 1.688-2.116        |
| Male                             | 1.025        | 0.591             | 0.937-1.120        | 1.062        | 0.141             | 0.980-1.149        |
| African American Race            | 0.954        | 0.386             | 0.858-1.061        | 0.976        | 0.609             | 0.887-1.072        |
| Pre-Transplant Dialysis**        | 1.052        | < 0.001           | 1.035-1.070        | 1.048        | < 0.001           | 1.033-1.064        |
| Prior Renal Transplant           | 1.200        | 0.031             | 1.017-1.417        | 1.220        | 0.007             | 1.055-1.410        |
| HCV+                             | 1.090        | 0.417             | 0.885-1.343        | 1.052        | 0.626             | 0.856-1.293        |

**Table S4d.** Cox proportional hazards model for time to all-cause allograft failure in discordant diabetic vs. non-diabetic recipient pairs: original multivariable results compared to using multiple imputation

|                                  | Multivariable Analysis* |                   |                    | Multivariable Analysis (after Multiple Imputation)* |                   |                    |
|----------------------------------|-------------------------|-------------------|--------------------|-----------------------------------------------------|-------------------|--------------------|
|                                  | HR                      | p-value           | 95% CI             | HR                                                  | p-value           | 95% CI             |
| <b>Non-Diabetic Donor</b>        |                         |                   |                    |                                                     |                   |                    |
| <b>Diabetic Recipient</b>        | <b>1.445</b>            | <b>&lt; 0.001</b> | <b>1.367-1.527</b> | <b>1.458</b>                                        | <b>&lt; 0.001</b> | <b>1.386-1.534</b> |
| <b>Non-Diabetic Recipient</b>    | REF                     |                   |                    | REF                                                 |                   |                    |
| <b>Diabetic Donor</b>            |                         |                   |                    |                                                     |                   |                    |
| <b>Diabetic Recipient</b>        | <b>1.269</b>            | <b>0.012</b>      | <b>1.054-1.528</b> | <b>1.250</b>                                        | <b>0.011</b>      | <b>1.053-1.484</b> |
| <b>Non-Diabetic Recipient</b>    | REF                     |                   |                    | REF                                                 |                   |                    |
| <b>Recipient Characteristics</b> |                         |                   |                    |                                                     |                   |                    |
| Age > 40                         | 1.019                   | 0.712             | 0.923-1.125        | 0.991                                               | 0.842             | 0.905-1.085        |
| Male                             | 1.061                   | 0.134             | 0.982-1.146        | 1.073                                               | 0.052             | 0.999-1.152        |
| African American Race            | 1.250                   | < 0.001           | 1.145-1.366        | 1.207                                               | < 0.001           | 1.113-1.309        |
| HCV+                             | 1.114                   | 0.222             | 0.936-1.326        | 1.044                                               | 0.578             | 0.896-1.217        |
| Max PRA ≥30                      | 1.226                   | < 0.001           | 1.104-1.361        | 1.230                                               | < 0.001           | 1.117-1.355        |
| No Induction Immunosuppression   | 1.083                   | 0.108             | 0.983-1.193        | 1.061                                               | 0.186             | 0.972-1.579        |

\*Tacrolimus and the interaction term between tacrolimus and time were also included in the multivariable model

\*\*Included as an interaction term along with duration of dialysis or diabetes, as appropriate
